# Supplementary material for: Surface zwitterionic functionalized graphene oxide for a novel loose nanofiltration membrane
Source: Royal Society of Chemistry journal article supplement (doi:10.1039/c5ta08024j), 2015-12-31
Supplement: c5ta08024j1.pdf [file c5ta08024j1.pdf]

## Supplementary Information

### **Surface zwitterionic functionalized graphene oxide for a novel loose nanofiltration membrane**

Junyong Zhu <sup>a</sup>, Miaomiao Tian <sup>a</sup>, Jingwei Hou <sup>b</sup>, Jing Wang <sup>a</sup>, Jiuyang Lin <sup>c</sup>, Yatao Zhang <sup>a</sup>, Jindun Liu <sup>a</sup>, Bart Van der Bruggen <sup>c</sup>

<sup>a</sup> *School of Chemical Engineering and Energy, Zhengzhou University, Zhengzhou 450001, P. R. China*

<sup>b</sup> *UNESCO Centre for Membrane Science and Technology, School of Chemical Engineering, University of New South Wales, Sydney, NSW 2052, Australia*

<sup>c</sup> *Department of Chemical Engineering, KU Leuven, Willem de Croylaan 46, B-3001 Heverlee, Belgium*

### S1. Synthesis of Graphene Oxide (GO)

Firstly, while maintaining agitation, graphite powder (4 g) was added into the mixture of sulfuric acid and phosphoric acid (9:1) in an ice bath, and potassium permanganate (27 g) was slowly added while preserving the temperature below 25°C for 15 min. Then the mixture was transferred to an oil bath and kept at 50°C for 20 h. The product was slowly poured into the mixture of ice (ca. 1200 mL) and H<sub>2</sub>O<sub>2</sub> (30%, 20 mL). A resulting bright yellow GO suspension was obtained. And then the suspension was washed with pure water and centrifuged several times to remove residual salts until a neutral pH was reached. Finally, GO was obtained by freeze drying for future use.

### S2. Synthesis of BTPAm

Amidation between BIBB and APTES was performed as follows: APTES (9 mL, 0.04 mol), TEA (6 mL, 0.04 mol) was dispersed into dried toluene (40 mL) under continuous stirring in an ice bath. Then BIBB (8.64 g, 0.04 mol) in 20 mL dried toluene was added dropwise into the above mixture, followed by stirring at 0°C for 3 h. Finally the reaction was further carried out at room temperature for another 10 h. The obtained liquid was separated from the white solids by filtration and then left in the flask to remove toluene using a rotary evaporator under vacuum. Finally the products (BTPAm) were sealed up and stored in a low temperature incubator before use.

S3. Silanization between Si-OH of BTPAm and the functional groups of GO was carried as follows. Briefly, exfoliation of GO (200 mg) in dried toluene (40 mL) was achieved with ultrasonic treatment for 30 min. After adding BTPAm (1.2 g), the

mixture was refluxed under N<sub>2</sub> protection at 120°C for 10 h. Finally the product (GO-Br) was collected by three cycles of centrifugation followed by drying in a vacuum oven at 40°C.

#### S4. XPS survey spectra of (a) GO and (b) GO-PSBMA

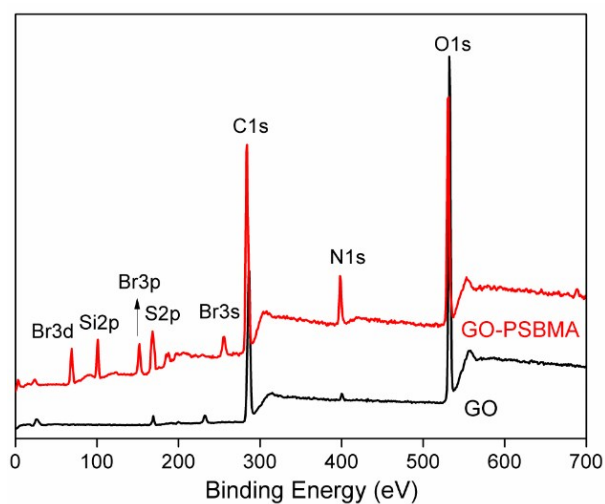

Fig. S4 XPS survey spectra of (a) GO and (b) GO-PSBMA

#### S5. Cross-sectional morphologies of GO-PSBMA/PES hybrid membranes

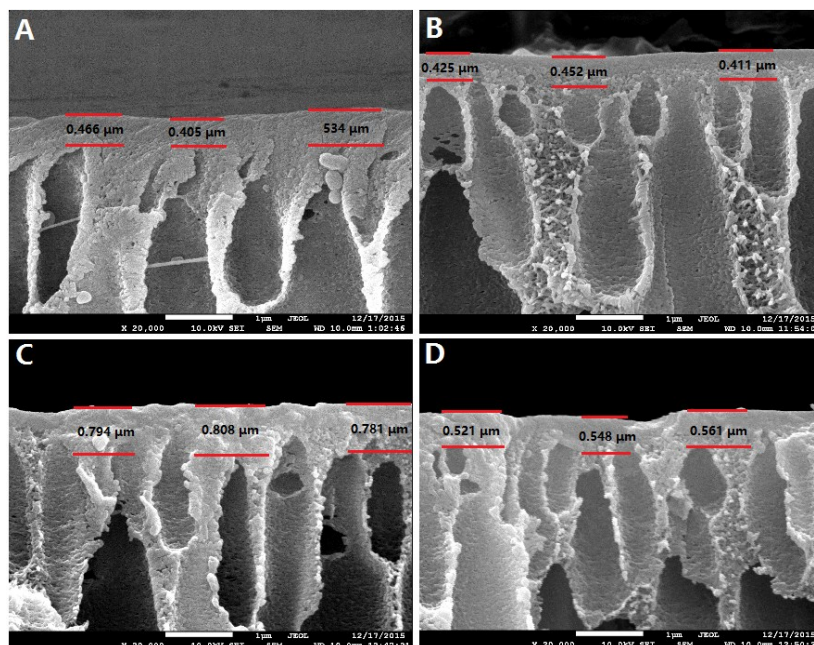

Fig. S5 Magnified cross-sectional morphologies of GO-PSBMA/PES hybrid membranes ( $\times 20,000$ ): (A) NFM-0, (B) NFM-1, (C) NFM-2, (D) NFM-3

S6. XPS survey spectra of (a) pristine membrane and (b) GO-PSBMA/PES membrane

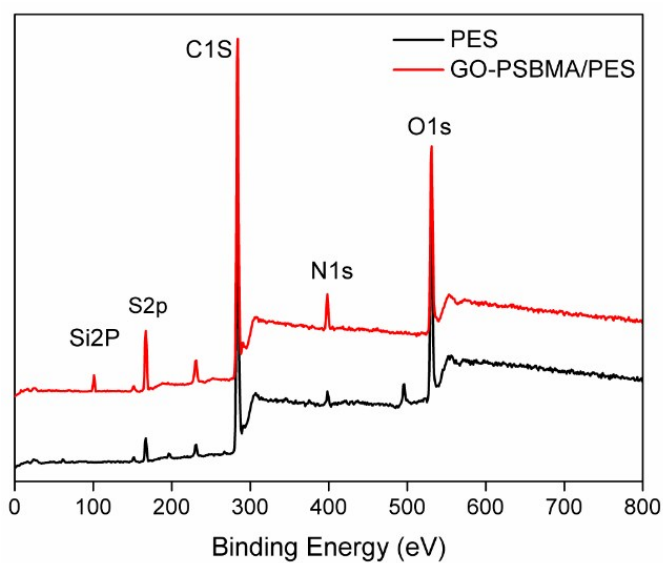

Fig. S6 XPS survey spectra of (a) pristine membrane and (b) GO-PSBMA/PES membrane (NFM-3)

S7. Porosity of Membranes

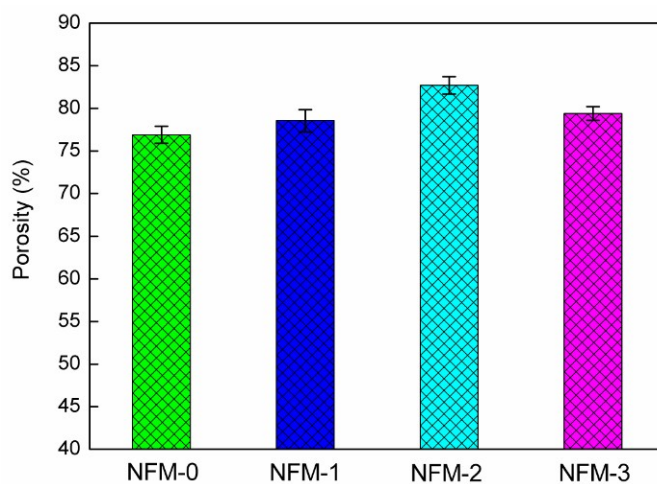

Fig. S7 Overall porosity of pristine membrane and GO-PSBMA/PES hybrid membranes

S8. Surface roughness of Membrane

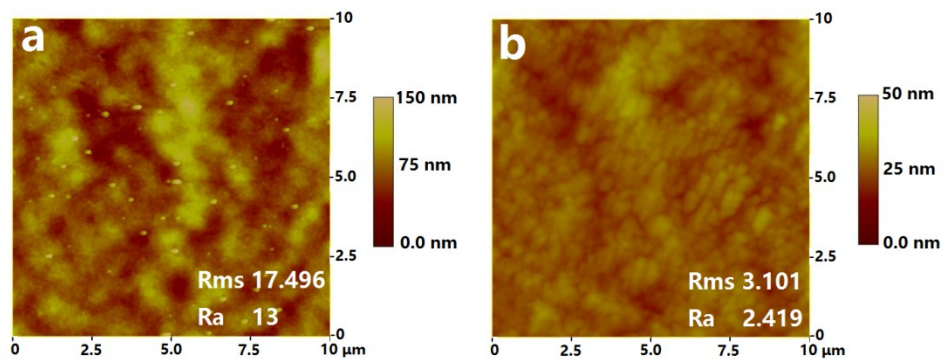

Fig. S8 AFM morphologies of (a) pristine membrane and (b) NFM-3
